# Supplementary material for: Brain Total Creatine Differs Between Primary Progressive Aphasia (PPA) Subtypes and Correlates with Disease Severity
Source: bioRxiv or medRxiv preprint supplement (doi:10.1101/2022.05.20.22275384), 2022-10-05
Supplement: Supplementary file [file media-2.pdf]

## Appendix B. Supplemental Tables

**Table B1.** Data Missing and Excluded from Statistical Analyses

|                    | <b>lvPPA</b><br>(total number<br>of subjects) | <b>nfvPPA</b><br>(total number of<br>subjects) | <b>svPPA</b><br>(total number of<br>subjects) | <b>Reason for Exclusion</b>                                                                   |
|--------------------|-----------------------------------------------|------------------------------------------------|-----------------------------------------------|-----------------------------------------------------------------------------------------------|
| Total <i>n</i>     | 22                                            | 27                                             | 12                                            | --                                                                                            |
| IFG short-TE PRESS | 20                                            | 24                                             | 12                                            | <i>n</i> = 2 missing<br><i>n</i> = 3 NAA linewidth > 15 Hz                                    |
| SM short-TE PRESS  | 22                                            | 27                                             | 12                                            | --                                                                                            |
| IFG MEGA-PRESS     | 17                                            | 23                                             | 9                                             | <i>n</i> = 1 missing<br><i>n</i> = 6 NAA linewidth > 15 Hz<br><i>n</i> = 5 incorrect sequence |
| SM MEGA-PRESS      | 19                                            | 26                                             | 11                                            | <i>n</i> = 5 incorrect sequence                                                               |
| FTD-CDR sum score  | 22                                            | 23                                             | 9                                             | <i>n</i> = 7 missing                                                                          |

**Table B2.** Differences in Metabolites by PPA Subtype and Brain Region

| Mean (SD)            |                   | Predictors                 | Estimates (SE) | CI            | t     | p          | Fit  |
|----------------------|-------------------|----------------------------|----------------|---------------|-------|------------|------|
| <b>tNAA (i.u.)</b>   |                   |                            |                |               |       |            |      |
| lvPPA: 18.12 (1.85)  | IFG: 16.51 (1.48) | <b>Fixed Effects</b>       |                |               |       |            |      |
| nfvPPA: 17.59 (2.03) | SMC: 19.05 (1.23) | (Intercept)                | 16.75 (0.27)   | 16.22-17.27   | 62.56 | < 0.001*** |      |
| svPPA: 17.87 (1.42)  |                   | Diagnosis (nfvPPA)         | -0.53 (0.33)   | -1.19-0.12    | -1.60 | 0.115      |      |
|                      |                   | Diagnosis (svPPA)          | -0.17 (0.41)   | -0.98-0.64    | -0.41 | 0.684      |      |
|                      |                   | Voxel (SMC)                | 2.58 (0.19)    | 2.20-2.95     | 13.44 | < 0.001*** |      |
|                      |                   | <b>Random Effects</b>      |                |               |       |            |      |
|                      |                   | $\sigma^2$                 | 1.02           |               |       |            |      |
|                      |                   | T00 Participant            | 0.76           |               |       |            |      |
|                      |                   | <b>Model Fit</b>           |                |               |       |            |      |
|                      |                   | Marginal R <sup>2</sup>    |                |               |       |            | 0.49 |
|                      |                   | Conditional R <sup>2</sup> |                |               |       |            | 0.71 |
| <b>tCho (i.u.)</b>   |                   |                            |                |               |       |            |      |
| lvPPA: 2.94 (0.32)   | IFG: 3.09 (0.33)  | <b>Fixed Effects</b>       |                |               |       |            |      |
| nfvPPA: 3.04 (0.41)  | SMC: 2.85 (0.38)  | (Intercept)                | 3.08 (0.07)    | 2.94-3.22     | 44.03 | < 0.001*** |      |
| svPPA: 2.83 (0.33)   |                   | Diagnosis (nfvPPA)         | 0.11 (0.09)    | -0.07-0.28    | 1.22  | 0.227      |      |
|                      |                   | Diagnosis (svPPA)          | -0.12 (0.11)   | -0.34-0.09    | -1.12 | 0.269      |      |
|                      |                   | Voxel (SMC)                | -0.26 (0.05)   | -0.35-(-0.16) | -5.38 | < 0.001*** |      |
|                      |                   | <b>Random Effects</b>      |                |               |       |            |      |
|                      |                   | $\sigma^2$                 | 0.06           |               |       |            |      |
|                      |                   | T00 Participant            | 0.06           |               |       |            |      |
|                      |                   | <b>Model Fit</b>           |                |               |       |            |      |
|                      |                   | Marginal R <sup>2</sup>    |                |               |       |            | 0.17 |
|                      |                   | Conditional R <sup>2</sup> |                |               |       |            | 0.57 |
| <b>tCr (i.u.)</b>    |                   |                            |                |               |       |            |      |
| lvPPA: 12.20 (0.70)  | IFG: 12.65 (0.79) | <b>Fixed Effects</b>       |                |               |       |            |      |
| nfvPPA: 12.51 (0.84) | SMC: 12.27 (0.75) | (Intercept)                | 12.41 (0.15)   | 12.12-12.70   | 84.62 | < 0.001*** |      |
| svPPA: 12.75 (0.70)  |                   | Diagnosis (nfvPPA)         | 0.34 (0.18)    | -0.02-0.69    | 1.84  | 0.071      |      |
|                      |                   | Diagnosis (svPPA)          | 0.54 (0.23)    | 0.10-0.99     | 2.40  | 0.019*     |      |
|                      |                   | Voxel (SMC)                | -0.40 (0.11)   | -0.61-(-0.19) | -3.78 | < 0.001*** |      |
|                      |                   | <b>Random Effects</b>      |                |               |       |            |      |
|                      |                   | $\sigma^2$                 | 0.31           |               |       |            |      |
|                      |                   | T00 Participant            | 0.22           |               |       |            |      |
|                      |                   | <b>Model Fit</b>           |                |               |       |            |      |
|                      |                   | Marginal R <sup>2</sup>    |                |               |       |            | 0.14 |
|                      |                   | Conditional R <sup>2</sup> |                |               |       |            | 0.49 |
| <b>Glx (i.u.)</b>    |                   |                            |                |               |       |            |      |
| lvPPA: 10.04 (2.68)  | IFG: 11.81 (2.53) | <b>Fixed Effects</b>       |                |               |       |            |      |
| nfvPPA: 10.97 (2.79) | SMC: 9.22 (2.35)  | (Intercept)                | 11.40 (0.48)   | 10.46-12.34   | 23.83 | < 0.001*** |      |
| svPPA: 10.12 (2.73)  |                   | Diagnosis (nfvPPA)         | 0.91 (0.60)    | -0.27-2.09    | 1.51  | 0.136      |      |
|                      |                   | Diagnosis (svPPA)          | 0.01 (0.74)    | -1.45-1.47    | 0.01  | 0.988      |      |
|                      |                   | Voxel (SMC)                | -2.58 (0.33)   | -3.23-(-1.93) | -7.79 | < 0.001*** |      |
|                      |                   | <b>Random Effects</b>      |                |               |       |            |      |
|                      |                   | $\sigma^2$                 | 3.03           |               |       |            |      |
|                      |                   | T00 Participant            | 2.58           |               |       |            |      |
|                      |                   | <b>Model Fit</b>           |                |               |       |            |      |
|                      |                   | Marginal R <sup>2</sup>    |                |               |       |            | 0.38 |
|                      |                   | Conditional R <sup>2</sup> |                |               |       |            | NA   |

**GABA+ (i.u.)**

lvPPA: 3.81 (1.32) IFG: 3.83 (1.34)  
 nfvPPA: 3.70 (1.24) SMC: 3.72 (1.11)  
 svPPA: 3.89 (1.02)

**Fixed Effects**

|                             |              |            |       |                      |
|-----------------------------|--------------|------------|-------|----------------------|
| <i>(Intercept)</i>          | 3.87 (0.25)  | 3.88-4.35  | 15.73 | <b>&lt; 0.001***</b> |
| Diagnosis ( <i>nfvPPA</i> ) | -0.10 (0.28) | -0.65-0.45 | -0.37 | 0.716                |
| Diagnosis ( <i>svPPA</i> )  | 0.10 (0.36)  | -0.60-0.80 | 0.28  | 0.782                |
| Voxel ( <i>SMC</i> )        | -0.11 (0.23) | -0.57-0.34 | -0.49 | 0.626                |

**Random Effects**

|                             |      |
|-----------------------------|------|
| $\sigma^2$                  | 1.35 |
| T <sub>00</sub> Participant | 0.11 |

**Model Fit**

|                            |      |
|----------------------------|------|
| Marginal R <sup>2</sup>    | 0.01 |
| Conditional R <sup>2</sup> | 0.08 |

*Table B2 Note.* \* $p < 0.05$ , \*\* $p < 0.01$ , \*\*\* $p < 0.001$ . SD = standard deviation; SE = standard error; CI = 95% confidence interval. On the left, we report the mean (standard deviation) for each metabolite, split by PPA subtype and by voxel. On the right, we report the results of a linear mixed effects model testing for PPA subtype and voxel differences in each metabolite. lvPPA and IFG served as the reference groups. Marginal R<sup>2</sup> values consider only the variance of the fixed effects; conditional R<sup>2</sup> values consider both the fixed and random effects.

**Table B3.** Differences in Tissue Fractions by PPA Subtype and Brain Region

| Mean (SD)                                                          |                  | Predictors                 | Estimates (SE) | CI            | t      | p          | Fit  |
|--------------------------------------------------------------------|------------------|----------------------------|----------------|---------------|--------|------------|------|
| <b>Gray Matter Fraction</b>                                        |                  |                            |                |               |        |            |      |
| lvPPA: 0.31 (0.06)                                                 | IFG: 0.34 (0.05) | <b>Fixed Effects</b>       |                |               |        |            |      |
| nfvPPA: 0.29 (0.06)                                                | SMC: 0.26 (0.04) | (Intercept)                | 0.35 (0.01)    | 0.33-0.37     | 42.98  | < 0.001*** |      |
| svPPA: 0.30 (0.06)                                                 |                  | Diagnosis (nfvPPA)         | -0.02 (0.01)   | -0.04-0.00    | -1.55  | 0.126      |      |
|                                                                    |                  | Diagnosis (svPPA)          | -0.01 (0.01)   | -0.04-0.01    | -0.85  | 0.397      |      |
|                                                                    |                  | Voxel (SMC)                | -0.08 (0.01)   | -0.10-(-0.07) | -13.95 | < 0.001*** |      |
|                                                                    |                  | <b>Random Effects</b>      |                |               |        |            |      |
|                                                                    |                  | $\sigma^2$                 | 0.00           |               |        |            |      |
|                                                                    |                  | T00 Participant            | 0.00           |               |        |            |      |
|                                                                    |                  | <b>Model Fit</b>           |                |               |        |            |      |
|                                                                    |                  | Marginal R <sup>2</sup>    |                |               |        |            | 0.52 |
|                                                                    |                  | Conditional R <sup>2</sup> |                |               |        |            | 0.71 |
| <b>White Matter Fraction</b>                                       |                  |                            |                |               |        |            |      |
| lvPPA: 0.54 (0.07)                                                 | IFG: 0.51 (0.07) | <b>Fixed Effects</b>       |                |               |        |            |      |
| nfvPPA: 0.54 (0.06)                                                | SMC: 0.57 (0.05) | (Intercept)                | 0.51 (0.01)    | 0.48-0.53     | 43.25  | < 0.001*** |      |
| svPPA: 0.55 (0.07)                                                 |                  | Diagnosis (nfvPPA)         | 0.001 (0.01)   | -0.03-0.03    | 0.05   | 0.962      |      |
|                                                                    |                  | Diagnosis (svPPA)          | 0.02 (0.02)    | -0.02-0.05    | 0.98   | 0.329      |      |
|                                                                    |                  | Voxel (SMC)                | 0.06 (0.01)    | 0.05-0.08     | 8.11   | < 0.001*** |      |
|                                                                    |                  | <b>Random Effects</b>      |                |               |        |            |      |
|                                                                    |                  | $\sigma^2$                 | 0.00           |               |        |            |      |
|                                                                    |                  | T00 Participant            | 0.00           |               |        |            |      |
|                                                                    |                  | <b>Model Fit</b>           |                |               |        |            |      |
|                                                                    |                  | Marginal R <sup>2</sup>    |                |               |        |            | 0.24 |
|                                                                    |                  | Conditional R <sup>2</sup> |                |               |        |            | 0.61 |
| <b>Total Tissue (Gray Matter Fraction + White Matter Fraction)</b> |                  |                            |                |               |        |            |      |
| lvPPA: 0.84 (0.05)                                                 | IFG: 0.85 (0.06) | <b>Fixed Effects</b>       |                |               |        |            |      |
| nfvPPA: 0.83 (0.06)                                                | SMC: 0.83 (0.05) | (Intercept)                | 0.86 (0.01)    | 0.83-0.88     | 80.96  | < 0.001*** |      |
| svPPA: 0.85 (0.05)                                                 |                  | Diagnosis (nfvPPA)         | -0.01 (0.01)   | -0.04-0.01    | -1.12  | 0.268      |      |
|                                                                    |                  | Diagnosis (svPPA)          | 0.01 (0.02)    | -0.02-0.04    | 0.46   | 0.645      |      |
|                                                                    |                  | Voxel (SMC)                | -0.02 (0.01)   | -0.04-(-0.01) | -2.61  | 0.012*     |      |
|                                                                    |                  | <b>Random Effects</b>      |                |               |        |            |      |
|                                                                    |                  | $\sigma^2$                 | 0.00           |               |        |            |      |
|                                                                    |                  | T00 Participant            | 0.00           |               |        |            |      |
|                                                                    |                  | <b>Model Fit</b>           |                |               |        |            |      |
|                                                                    |                  | Marginal R <sup>2</sup>    |                |               |        |            | 0.06 |
|                                                                    |                  | Conditional R <sup>2</sup> |                |               |        |            | 0.42 |

Table B3 Note. \* $p < 0.05$ , \*\* $p < 0.01$ , \*\*\* $p < 0.001$ . SD = standard deviation; SE = standard error; CI = 95% confidence interval. On the left, we report the mean (standard deviation) for each tissue fraction, split by PPA subtype and by voxel. On the right, we report the results of a linear mixed effects model testing for PPA subtype and voxel differences in each tissue fraction. lvPPA and IFG served as the reference groups. Marginal R<sup>2</sup> values consider only the variance of the fixed effects; conditional R<sup>2</sup> values consider both the fixed and random effects.
